# Supplementary material
Source: PubMed Central journal article supplement (PMC3587287)

## The Universe of Putative *N*-Acyl Amides

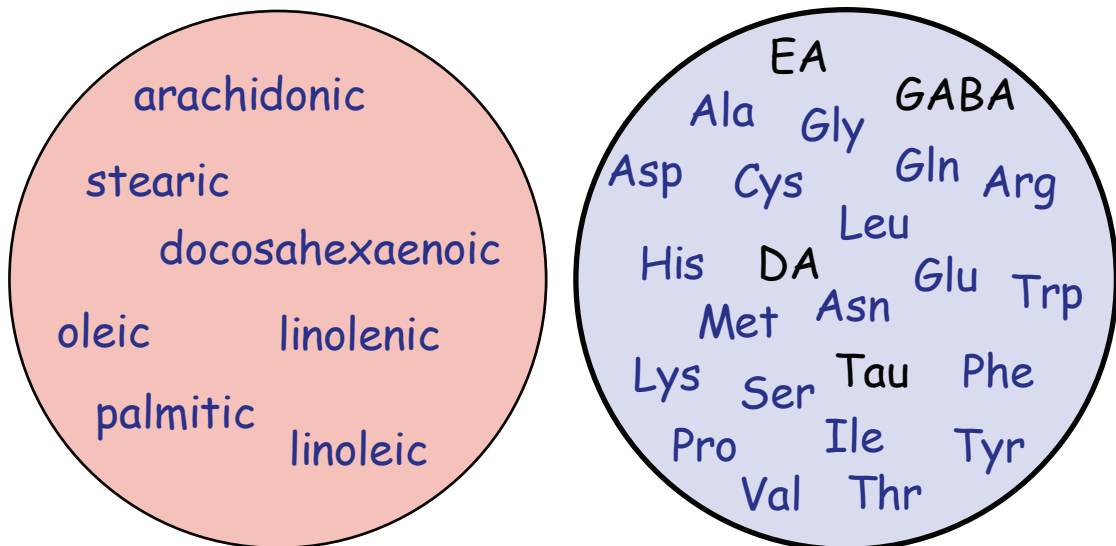

7 common fatty acids X 24 amines  
168 potential combinations

Supplement: NIHMS423127-supplement-01.pdf [file NIHMS423127-supplement-01.pdf]
